# Supplementary material for: Synthesis and structural study of new metallasilsesquioxanes of potassium and uranium
Source: Royal Society of Chemistry journal article supplement (doi:10.1039/c7dt00006e), 2017-01-01
Supplement: c7dt00006e1.pdf [file c7dt00006e1.pdf]

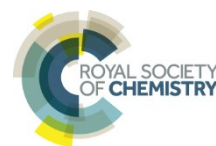

**Dalton Transactions**

**Synthesis and structural study of new metallasilsesquioxanes  
of potassium and uranium**

Stephan Gießmann, Volker Lorenz, Phil Liebing, Liane Hilfert, Axel Fischer, and Frank T.  
Edelmann\*

*Chemisches Institut der Otto-von-Guericke-Universität, 39106 Magdeburg, Germany.*

**Supporting Information**

**STRUCTURE REPORT for Compound 2**

**STRUCTURE REPORT for Compound 3**

## STRUCTURE REPORT for Compound 2

**Crystallographer:** A. Fischer, P. Liebing  
**ID code:** LOKA  
**Compound:**  $(\text{C}_7\text{Si}_7\text{O}_{12})_2\text{K}_6(\text{DME})_4$  (**2**)  
**Formula sum:**  $\text{C}_{100}\text{H}_{194}\text{K}_6\text{O}_{32}\text{Si}_{14}$   
**Formula moieties:**  $\text{C}_{100}\text{H}_{194}\text{K}_6\text{O}_{32}\text{Si}_{14}$

**Date:** 20 December 2016

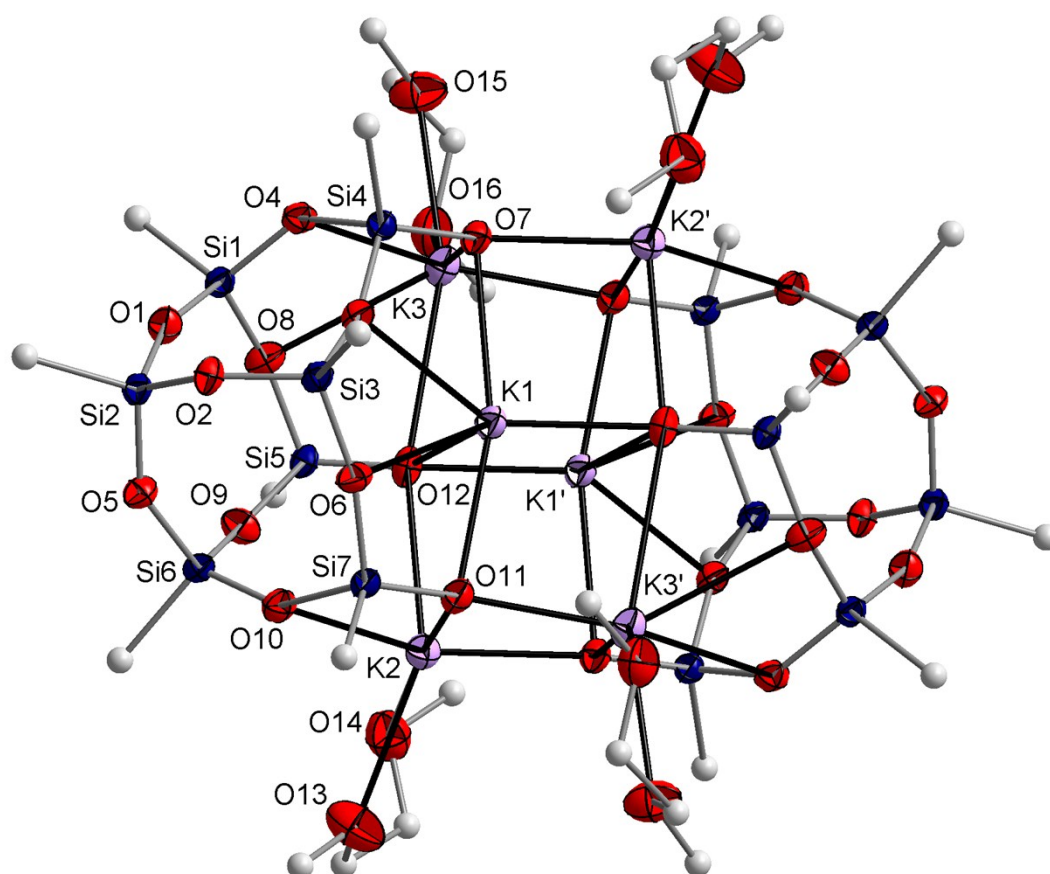

**Figure S1.** Molecular structure of **2** in the crystal showing the atom-labeling scheme (displacement ellipsoids of K, Si and O drawn at the 50% probability level, H atoms and peripheral C atoms of the cyclohexyl groups omitted for clarity). Symmetry code:  $1-x, 2-y, 1-z$ .

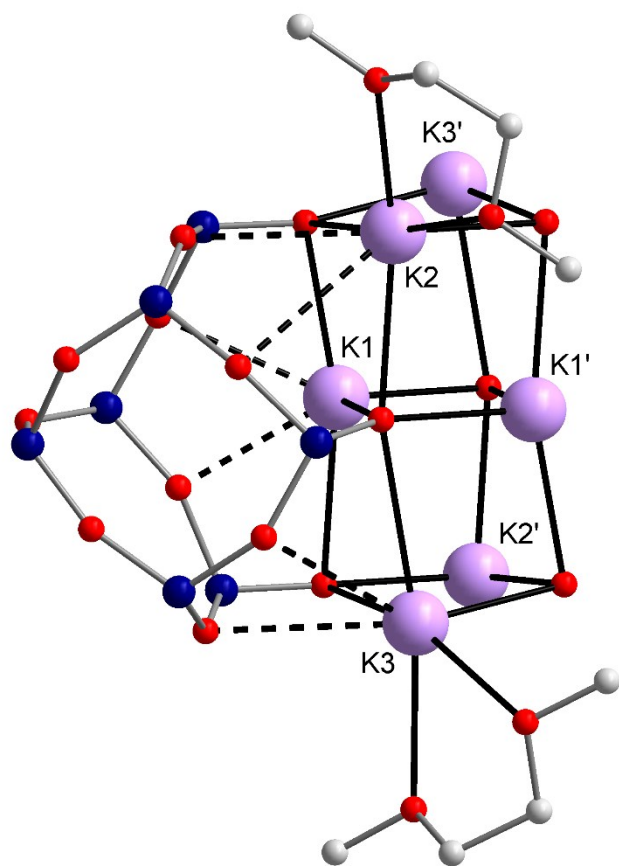

**Figure S2.** Representation of the coordination sphere of the potassium atoms in compound **2**.

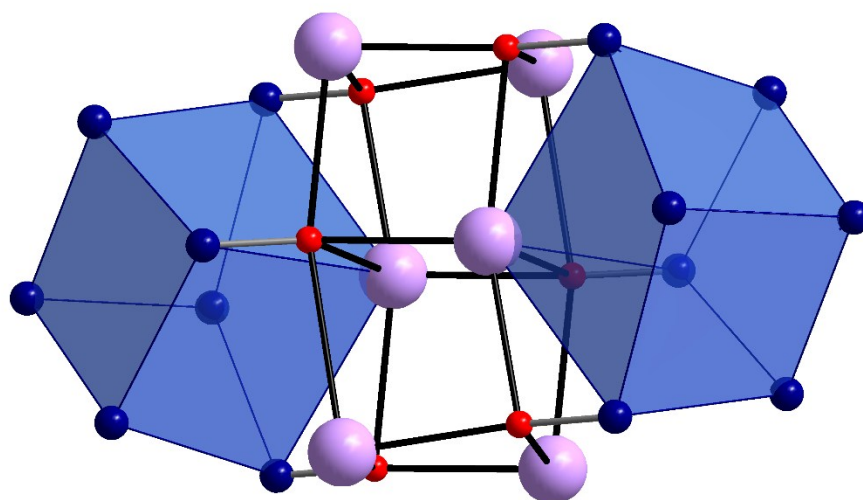

**Figure S3.** Representation of the interconnection of the two cube-shaped  $\text{Si}_7\text{K}$  frameworks in compound **2**.

## List of Tables

**Table S1.** Crystallographic Data and Details on Structure Refinement for Compound **2**.

**Table S2.** Atomic Coordinates and Equivalent Isotropic Displacement Parameters for Compound **2**.

**Table S3.** Selected Interatomic Distances for Compound **2**.

**Table S4.** Selected Interatomic Angles for Compound **2**.

**Table S5.** Derived H Atom Coordinates and Isotropic Displacement Parameters for Compound **2**.

**Table S1.** Crystallographic Data and Details on Structure Refinement for Compound **2**.

|                                                                                                                                                                     |                                                                                   |
|---------------------------------------------------------------------------------------------------------------------------------------------------------------------|-----------------------------------------------------------------------------------|
| formula sum                                                                                                                                                         | C <sub>100</sub> H <sub>194</sub> K <sub>6</sub> O <sub>32</sub> Si <sub>14</sub> |
| formula weight                                                                                                                                                      | 2536.40                                                                           |
| crystal color / shape / size (mm)                                                                                                                                   | colorless plates / 0.25 × 0.14 × 0.08                                             |
| crystal system                                                                                                                                                      | triclinic                                                                         |
| space group                                                                                                                                                         | <i>P</i> $\bar{1}$                                                                |
| unit cell parameters                                                                                                                                                |                                                                                   |
| <i>a</i> (Å)                                                                                                                                                        | 15.1248(6)                                                                        |
| <i>b</i> (Å)                                                                                                                                                        | 15.1905(6)                                                                        |
| <i>c</i> (Å)                                                                                                                                                        | 16.8898(6)                                                                        |
| α (deg)                                                                                                                                                             | 101.994(3)                                                                        |
| β (deg)                                                                                                                                                             | 96.467(3)                                                                         |
| γ (deg)                                                                                                                                                             | 115.554(3)                                                                        |
| unit cell volume <i>V</i> (Å <sup>3</sup> )                                                                                                                         | 3333.3(2)                                                                         |
| molecules per cell <i>z</i>                                                                                                                                         | 1                                                                                 |
| crystallographic density ρ <sub>calcd</sub> (g cm <sup>-3</sup> )                                                                                                   | 1.264                                                                             |
| absorption coefficient μ (mm <sup>-1</sup> )                                                                                                                        | 0.389                                                                             |
| diffractometer                                                                                                                                                      | Bruker Smart CCD System                                                           |
| radiation (λ [Å])                                                                                                                                                   | graphite-monochromated Mo-K <sub>α</sub> (0.71073)                                |
| temperature (°C)                                                                                                                                                    | -73(2)                                                                            |
| scan type <sup>a</sup>                                                                                                                                              | ω scans                                                                           |
| completeness of dataset                                                                                                                                             | 98.0%                                                                             |
| θ range of data collection (deg)                                                                                                                                    | 1.551 ... 25.000                                                                  |
| reflections collected <sup>a</sup>                                                                                                                                  | 17619 (-17 ≤ <i>h</i> ≤ 15, -15 ≤ <i>k</i> ≤ 18, -20 ≤ <i>l</i> ≤ 18)             |
| independent reflections                                                                                                                                             | 11495 ( <i>R</i> <sub>int</sub> = 0.0470)                                         |
| independent reflections with <i>I</i> > 2σ( <i>I</i> )                                                                                                              | 6880                                                                              |
| structure solution method                                                                                                                                           | direct methods (SHELXS-97 <sup>b</sup> )                                          |
| refinement method                                                                                                                                                   | full-matrix least-squares on <i>F</i> <sup>2</sup> (SHELXL-2016/4 <sup>b</sup> )  |
| absorption correction method <sup>a</sup>                                                                                                                           | multi-scan                                                                        |
| range of transmission factors                                                                                                                                       | 0.9 ... 1.0                                                                       |
| data / parameters / restraints                                                                                                                                      | 11495 / 685 / 0                                                                   |
| goodness of fit (GooF) [all data]                                                                                                                                   | 1.037                                                                             |
| final <i>R</i> values                                                                                                                                               |                                                                                   |
| <i>R</i> <sub>1</sub> [all data, <i>I</i> ≥ 2σ( <i>I</i> )]                                                                                                         | 0.1268, 0.0617                                                                    |
| <i>wR</i> <sub>2</sub> [all data, <i>I</i> ≥ 2σ( <i>I</i> )]                                                                                                        | 0.1275, 0.1015                                                                    |
| largest difference peak and hole                                                                                                                                    | 0.371 and -0.400 e Å <sup>-3</sup>                                                |
| Refinement special details: Reflections (0 0 1), (-1 1 0) and (1 0 0) are strongly disagreeing with the structural model and were therefore omitted for refinement. |                                                                                   |

<sup>a</sup> Bruker (2001). *AXS SMART and SADABS*. Bruker AXS Inc., Madison, Wisconsin, USA.<sup>b</sup> G. M. Sheldrick, *Acta Cryst.* 2015, **C71**, 3–8.

**Table S2.** Atomic Coordinates and Equivalent Isotropic Displacement Parameters for Compound **2**.

| Atom | x          | y           | z           | $U_{\text{eq}} / \text{\AA}^2$ |
|------|------------|-------------|-------------|--------------------------------|
| K1   | 0.53345(7) | 1.00149(7)  | 0.41131(6)  | 0.0283(2)                      |
| K2   | 0.31787(8) | 1.07651(7)  | 0.45142(6)  | 0.0325(3)                      |
| K3   | 0.40675(8) | 0.73496(7)  | 0.47589(6)  | 0.0324(3)                      |
| O1   | 0.3430(2)  | 0.8997(2)   | 0.44119(18) | 0.0308(8)                      |
| O2   | 0.4752(2)  | 1.1411(2)   | 0.38004(18) | 0.0294(7)                      |
| O3   | 0.5602(2)  | 0.8258(2)   | 0.40064(17) | 0.0271(7)                      |
| O4   | 0.5019(2)  | 0.86529(19) | 0.26379(17) | 0.0259(7)                      |
| O5   | 0.4830(2)  | 1.0228(2)   | 0.24442(18) | 0.0302(8)                      |
| O6   | 0.3994(2)  | 0.6808(2)   | 0.28220(18) | 0.0267(7)                      |
| O7   | 0.4019(2)  | 0.8532(2)   | 0.11930(17) | 0.0266(7)                      |
| O8   | 0.3091(2)  | 1.0237(2)   | 0.25761(18) | 0.0292(7)                      |
| O9   | 0.2767(2)  | 0.7009(2)   | 0.16979(18) | 0.0313(8)                      |
| O10  | 0.2555(2)  | 0.7180(2)   | 0.32722(18) | 0.0318(8)                      |
| O11  | 0.2273(2)  | 0.8407(2)   | 0.14449(18) | 0.0324(8)                      |
| O12  | 0.2075(2)  | 0.8593(2)   | 0.30147(19) | 0.0327(8)                      |
| O13  | 0.1896(3)  | 1.1629(3)   | 0.4292(3)   | 0.0641(12)                     |
| O14  | 0.1440(3)  | 1.0296(3)   | 0.5314(2)   | 0.0550(10)                     |
| O15  | 0.4055(3)  | 0.5495(3)   | 0.4733(2)   | 0.0563(11)                     |
| O16  | 0.2849(3)  | 0.6022(3)   | 0.5693(2)   | 0.0477(9)                      |
| SI1  | 0.28469(9) | 0.66028(8)  | 0.25068(8)  | 0.0230(3)                      |
| SI2  | 0.28338(9) | 0.77507(9)  | 0.11196(8)  | 0.0233(3)                      |
| SI3  | 0.49740(9) | 0.92757(9)  | 0.19727(8)  | 0.0232(3)                      |
| SI4  | 0.51493(9) | 0.77862(9)  | 0.30388(8)  | 0.0237(3)                      |
| SI5  | 0.24371(9) | 0.81734(9)  | 0.37549(8)  | 0.0225(3)                      |
| SI6  | 0.21497(9) | 0.91045(9)  | 0.22633(8)  | 0.0230(3)                      |
| SI7  | 0.43366(9) | 1.09654(9)  | 0.28305(8)  | 0.0236(3)                      |
| C11  | 0.1938(3)  | 0.5220(3)   | 0.2183(3)   | 0.0298(11)                     |
| C12  | 0.1691(4)  | 0.4749(3)   | 0.2902(3)   | 0.0431(14)                     |
| C13  | 0.0899(4)  | 0.3637(4)   | 0.2603(4)   | 0.070(2)                       |
| C14  | 0.1220(5)  | 0.3018(4)   | 0.1971(5)   | 0.077(2)                       |
| C15  | 0.1430(5)  | 0.3459(4)   | 0.1251(4)   | 0.071(2)                       |
| C16  | 0.2236(4)  | 0.4580(3)   | 0.1547(3)   | 0.0435(14)                     |
| C21  | 0.2264(3)  | 0.6975(3)   | 0.0018(3)   | 0.0259(10)                     |
| C22  | 0.1254(3)  | 0.6023(4)   | -0.0114(3)  | 0.0417(13)                     |
| C23  | 0.0820(4)  | 0.5380(4)   | -0.1027(3)  | 0.0533(15)                     |
| C24  | 0.1576(4)  | 0.5099(4)   | -0.1371(3)  | 0.0586(16)                     |
| C25  | 0.2558(4)  | 0.6034(4)   | -0.1280(3)  | 0.0535(16)                     |
| C26  | 0.3004(4)  | 0.6675(4)   | -0.0367(3)  | 0.0435(14)                     |
| C31  | 0.6181(3)  | 0.9759(3)   | 0.1630(3)   | 0.0282(11)                     |
| C32  | 0.7065(3)  | 1.0554(4)   | 0.2358(3)   | 0.0432(13)                     |
| C33  | 0.8086(4)  | 1.0902(4)   | 0.2113(4)   | 0.0591(17)                     |
| C34  | 0.8077(4)  | 1.1310(4)   | 0.1366(4)   | 0.0564(16)                     |
| C35  | 0.7211(4)  | 1.0529(4)   | 0.0643(3)   | 0.0471(14)                     |
| C36  | 0.6195(3)  | 1.0190(4)   | 0.0888(3)   | 0.0367(12)                     |
| C41  | 0.5865(3)  | 0.7292(3)   | 0.2398(3)   | 0.0259(11)                     |
| C42  | 0.6122(4)  | 0.6533(4)   | 0.2710(3)   | 0.0400(13)                     |
| C43  | 0.6760(4)  | 0.6210(4)   | 0.2197(3)   | 0.0567(16)                     |
| C44  | 0.6228(5)  | 0.5749(4)   | 0.1282(3)   | 0.0546(16)                     |
| C45  | 0.5937(4)  | 0.6464(4)   | 0.0940(3)   | 0.0416(13)                     |
| C46  | 0.5315(3)  | 0.6804(3)   | 0.1467(3)   | 0.0336(12)                     |
| C51  | 0.1301(3)  | 0.7638(3)   | 0.4201(3)   | 0.0304(11)                     |

**Table S2 (continued).** Atomic Coordinates and Equivalent Isotropic Displacement Parameters for Compound 2.

| Atom | x          | y         | z         | $U_{\text{eq}} / \text{\AA}^2$ |
|------|------------|-----------|-----------|--------------------------------|
| C52  | 0.0369(3)  | 0.6775(4) | 0.3547(3) | 0.0404(13)                     |
| C53  | -0.0569(4) | 0.6363(4) | 0.3916(4) | 0.0617(17)                     |
| C54  | -0.0344(4) | 0.6036(5) | 0.4669(4) | 0.0638(18)                     |
| C55  | 0.0550(4)  | 0.6883(4) | 0.5329(3) | 0.0516(15)                     |
| C56  | 0.1492(4)  | 0.7298(4) | 0.4961(3) | 0.0403(13)                     |
| C61  | 0.0953(3)  | 0.9159(3) | 0.1951(3) | 0.0269(11)                     |
| C62  | 0.0053(3)  | 0.8102(3) | 0.1546(3) | 0.0456(14)                     |
| C63  | -0.0934(4) | 0.8151(4) | 0.1329(4) | 0.0622(17)                     |
| C64  | -0.0859(4) | 0.8846(4) | 0.0779(4) | 0.0540(15)                     |
| C65  | 0.0029(4)  | 0.9905(4) | 0.1182(3) | 0.0501(15)                     |
| C66  | 0.1007(4)  | 0.9853(3) | 0.1388(3) | 0.0383(12)                     |
| C71  | 0.4533(3)  | 1.1913(3) | 0.2221(3) | 0.0269(11)                     |
| C72  | 0.4094(4)  | 1.2618(3) | 0.2554(3) | 0.0393(13)                     |
| C73  | 0.4217(5)  | 1.3396(4) | 0.2078(3) | 0.0543(16)                     |
| C74  | 0.3766(4)  | 1.2885(4) | 0.1156(3) | 0.0510(15)                     |
| C75  | 0.4231(4)  | 1.2219(4) | 0.0810(3) | 0.0451(14)                     |
| C76  | 0.4103(4)  | 1.1421(3) | 0.1281(3) | 0.0369(12)                     |
| C100 | 0.1704(5)  | 1.1912(5) | 0.3575(4) | 0.084(2)                       |
| C101 | 0.1125(6)  | 1.1429(6) | 0.4697(5) | 0.092(3)                       |
| C102 | 0.1370(7)  | 1.1199(6) | 0.5477(4) | 0.103(3)                       |
| C103 | 0.1773(5)  | 1.0090(5) | 0.6041(4) | 0.0722(19)                     |
| C200 | 0.4264(5)  | 0.5006(5) | 0.4019(4) | 0.089(2)                       |
| C201 | 0.3309(4)  | 0.4789(4) | 0.5038(4) | 0.0551(16)                     |
| C202 | 0.3222(4)  | 0.5344(4) | 0.5838(4) | 0.0557(16)                     |

**Table S3.** Selected Interatomic Distances (pm) for Compound 2.

| Atom 1 | Atom 2 | Distance | Atom 1 | Atom 2 | Distance |
|--------|--------|----------|--------|--------|----------|
| K1     | O1     | 278.4(3) | SI1    | O9     | 162.4(3) |
| K1     | O1'    | 263.2(3) | SI1    | O10    | 162.1(3) |
| K1     | O2     | 274.4(3) | SI2    | O7     | 164.0(3) |
| K1     | O3     | 284.0(3) | SI2    | O9     | 161.7(3) |
| K1     | O4     | 273.0(3) | SI2    | O11    | 162.0(3) |
| K1     | O5     | 295.6(3) | SI3    | O4     | 162.6(3) |
| K2     | O1     | 284.4(3) | SI3    | O5     | 161.4(3) |
| K2     | O2     | 268.3(3) | SI3    | O7     | 162.5(3) |
| K2     | O3'    | 262.8(3) | SI4    | O3     | 157.8(3) |
| K2     | O8     | 317.7(3) | SI4    | O4     | 167.2(3) |
| K2     | O12    | 330.3(3) | SI4    | O6     | 166.9(3) |
| K2     | O13    | 280.4(4) | SI5    | O1     | 157.4(3) |
| K2     | O14    | 297.2(4) | SI5    | O10    | 165.2(3) |
| K3     | O1     | 317.8(3) | SI5    | O12    | 165.7(3) |
| K3     | O2'    | 262.1(3) | SI6    | O8     | 161.4(3) |
| K3     | O3     | 274.5(3) | SI6    | O11    | 163.9(3) |
| K3     | O6     | 318.0(3) | SI6    | O12    | 161.1(3) |
| K3     | O10    | 308.8(3) | SI7    | O2     | 157.4(3) |
| K3     | O15    | 280.1(3) | SI7    | O5     | 166.3(3) |
| K3     | O16    | 295.4(3) | SI7    | O8     | 166.8(3) |
| SI1    | O6     | 162.7(3) |        |        |          |

<sup>a</sup>1-x, 2-y, 1-z

**Table S4.** Selected Interatomic Angles (deg.) for Compound 2.

| Atom 1 | Atom 2 | Atom 3 | Angle      | Atom 1 | Atom 2 | Atom 3 | Angle      |
|--------|--------|--------|------------|--------|--------|--------|------------|
| O1     | K1     | O1'    | 105.76(8)  | O3     | K3     | O16    | 159.83(10) |
| O1     | K1     | O2     | 86.04(9)   | O6     | K3     | O10    | 49.50(7)   |
| O1'    | K1     | O2     | 101.93(9)  | O6     | K3     | O15    | 87.47(9)   |
| O1     | K1     | O3     | 90.26(8)   | O6     | K3     | O16    | 128.21(9)  |
| O1'    | K1     | O3     | 93.43(9)   | O10    | K3     | O15    | 113.09(10) |
| O1     | K1     | O4     | 97.09(9)   | O10    | K3     | O16    | 105.92(9)  |
| O1'    | K1     | O4     | 142.76(9)  | O15    | K3     | O16    | 58.77(10)  |
| O1     | K1     | O5     | 101.50(9)  | K1     | O1     | K1'    | 74.24(8)   |
| O1'    | K1     | O5     | 142.95(9)  | K1     | O1     | K2     | 89.74(8)   |
| O2     | K1     | O3     | 164.63(9)  | K1'    | O1     | K2     | 86.49(8)   |
| O2     | K1     | O4     | 108.74(9)  | K1     | O1     | K3     | 86.81(8)   |
| O2     | K1     | O5     | 55.27(8)   | K1'    | O1     | K3     | 78.85(8)   |
| O3     | K1     | O4     | 56.91(8)   | K2     | O1     | K3     | 165.33(11) |
| O3     | K1     | O5     | 111.20(8)  | K1     | O1     | SI5    | 127.10(15) |
| O4     | K1     | O5     | 54.44(8)   | K1'    | O1     | SI5    | 157.16(16) |
| O1     | K2     | O2     | 86.00(8)   | K2     | O1     | SI5    | 100.30(14) |
| O1     | K2     | O3'    | 93.42(9)   | K3     | O1     | SI5    | 93.13(12)  |
| O1     | K2     | O8     | 84.09(8)   | K1     | O2     | K2     | 94.06(9)   |
| O1     | K2     | O12    | 51.74(8)   | K1     | O2     | K3'    | 87.59(9)   |
| O1     | K2     | O13    | 149.10(11) | K2     | O2     | K3'    | 90.33(9)   |
| O1     | K2     | O14    | 101.12(9)  | K1     | O2     | SI7    | 99.95(13)  |
| O2     | K2     | O3'    | 90.23(9)   | K2     | O2     | SI7    | 107.86(15) |
| O2     | K2     | O8     | 53.70(8)   | K3'    | O2     | SI7    | 159.58(16) |
| O2     | K2     | O12    | 89.49(8)   | K1     | O3     | K2'    | 86.66(8)   |
| O2     | K2     | O13    | 114.80(10) | K1     | O3     | K3     | 94.65(8)   |
| O2     | K2     | O14    | 172.87(10) | K2'    | O3     | K3     | 88.85(9)   |
| O3'    | K2     | O8     | 143.92(8)  | K1     | O3     | SI4    | 95.05(13)  |
| O3'    | K2     | O12    | 145.09(8)  | K2'    | O3     | SI4    | 164.30(16) |
| O3'    | K2     | O13    | 108.30(11) | K3     | O3     | SI4    | 106.53(14) |
| O3'    | K2     | O14    | 89.05(10)  | K1     | O4     | SI3    | 102.17(12) |
| O8     | K2     | O12    | 47.62(7)   | K1     | O4     | SI4    | 96.90(13)  |
| O8     | K2     | O13    | 90.34(10)  | SI3    | O4     | SI4    | 159.74(18) |
| O8     | K2     | O14    | 126.82(10) | SI3    | O5     | SI7    | 163.6(2)   |
| O12    | K2     | O13    | 103.41(11) | SI1    | O6     | SI4    | 136.78(17) |
| O12    | K2     | O14    | 95.16(9)   | SI2    | O7     | SI3    | 133.64(18) |
| O13    | K2     | O14    | 58.84(11)  | SI6    | O8     | SI7    | 147.90(18) |
| O1     | K3     | O2'    | 91.63(8)   | SI1    | O9     | SI2    | 161.8(2)   |
| O1     | K3     | O3     | 84.26(8)   | SI1    | O10    | SI5    | 150.20(19) |
| O1     | K3     | O6     | 84.42(7)   | SI2    | O11    | SI6    | 145.1(2)   |
| O1     | K3     | O10    | 50.47(7)   | SI5    | O12    | SI6    | 158.3(2)   |
| O1     | K3     | O15    | 162.43(11) | O6     | SI1    | O9     | 109.80(15) |
| O1     | K3     | O16    | 115.63(9)  | O6     | SI1    | O10    | 107.86(17) |
| O2'    | K3     | O3     | 89.03(9)   | O9     | SI1    | O10    | 111.78(16) |
| O2'    | K3     | O6     | 142.34(8)  | O7     | SI2    | O9     | 109.41(16) |
| O2'    | K3     | O10    | 142.03(9)  | O7     | SI2    | O11    | 109.05(15) |
| O2'    | K3     | O15    | 104.22(11) | O9     | SI2    | O11    | 108.81(16) |
| O2'    | K3     | O16    | 87.10(9)   | O4     | SI3    | O5     | 107.27(15) |
| O3     | K3     | O6     | 53.32(8)   | O4     | SI3    | O7     | 109.17(15) |
| O3     | K3     | O10    | 89.15(8)   | O5     | SI3    | O7     | 109.89(16) |
| O3     | K3     | O15    | 103.27(9)  | O3     | SI4    | O4     | 109.56(15) |

‘ 1-x, 2-y, 1-z.



**Table S4 (continued).** Selected Interatomic Angles (deg.) for Compound **2**.

| Atom 1 | Atom 2 | Atom 3 | Angle      | Atom 1 | Atom 2 | Atom 3 | Angle      |
|--------|--------|--------|------------|--------|--------|--------|------------|
| O3     | SI4    | O6     | 111.65(15) | O8     | SI6    | O12    | 108.63(17) |
| O4     | SI4    | O6     | 105.56(15) | O11    | SI6    | O12    | 110.59(16) |
| O1     | SI5    | O10    | 111.87(16) | O2     | SI7    | O5     | 109.94(16) |
| O1     | SI5    | O12    | 114.24(16) | O2     | SI7    | O8     | 111.72(16) |
| O10    | SI5    | O12    | 106.01(16) | O5     | SI7    | O8     | 106.58(15) |
| O8     | SI6    | O11    | 111.15(15) |        |        |        |            |

**Table S5.** Derived H Atom Coordinates and Isotropic Displacement Parameters for Compound **2**.

| Atom | x        | y         | z         | $U_{\text{iso}} / \text{\AA}^2$ |
|------|----------|-----------|-----------|---------------------------------|
| H10A | 0.226989 | 1.204.872 | 0.330282  | 0.100                           |
| H10B | 0.108657 | 1.135.800 | 0.319087  | 0.100                           |
| H10C | 0.162349 | 1.252.690 | 0.373142  | 0.100                           |
| H10D | 0.050211 | 1.084.137 | 0.433024  | 0.111                           |
| H10E | 0.099985 | 1.202.575 | 0.482547  | 0.111                           |
| H10F | 0.201823 | 1.176.568 | 0.582566  | 0.123                           |
| H10G | 0.084190 | 1.113.891 | 0.579034  | 0.123                           |
| H10H | 0.180515 | 0.944792  | 0.588473  | 0.087                           |
| H10I | 0.244243 | 1.064.414 | 0.633740  | 0.087                           |
| H10J | 0.129995 | 1.003.525 | 0.640330  | 0.087                           |
| H11  | 0.129199 | 0.515665  | 0.189016  | 0.036                           |
| H12A | 0.231355 | 0.480649  | 0.322171  | 0.052                           |
| H12B | 0.144667 | 0.513788  | 0.328127  | 0.052                           |
| H13A | 0.025079 | 0.358191  | 0.234199  | 0.084                           |
| H13B | 0.080062 | 0.335524  | 0.308296  | 0.084                           |
| H14A | 0.183200 | 0.301653  | 0.224699  | 0.092                           |
| H14B | 0.067843 | 0.230436  | 0.176169  | 0.092                           |
| H15A | 0.080136 | 0.340282  | 0.094521  | 0.086                           |
| H15B | 0.166071 | 0.306262  | 0.086440  | 0.086                           |
| H16A | 0.233107 | 0.485530  | 0.106325  | 0.052                           |
| H16B | 0.288406 | 0.462938  | 0.180214  | 0.052                           |
| H20A | 0.478190 | 0.552007  | 0.382844  | 0.107                           |
| H20B | 0.450437 | 0.454135  | 0.416012  | 0.107                           |
| H20C | 0.364825 | 0.462030  | 0.357554  | 0.107                           |
| H20D | 0.349688 | 0.426162  | 0.512634  | 0.066                           |
| H20E | 0.265460 | 0.444780  | 0.462926  | 0.066                           |
| H20F | 0.276059 | 0.485062  | 0.609058  | 0.067                           |
| H20G | 0.389081 | 0.573074  | 0.622912  | 0.067                           |
| H20H | 0.244972 | 0.698914  | 0.631676  | 0.078                           |
| H20I | 0.222285 | 0.602383  | 0.665775  | 0.078                           |
| H20J | 0.335172 | 0.691945  | 0.684615  | 0.078                           |
| H21  | 0.213290 | 0.741514  | -0.029374 | 0.031                           |
| H22A | 0.134887 | 0.559867  | 0.022611  | 0.050                           |
| H22B | 0.076413 | 0.623454  | 0.008316  | 0.050                           |
| H23A | 0.019884 | 0.475152  | -0.107034 | 0.064                           |
| H23B | 0.064027 | 0.576863  | -0.135937 | 0.064                           |
| H24A | 0.170411 | 0.465446  | -0.107290 | 0.070                           |
| H24B | 0.129270 | 0.471317  | -0.196640 | 0.070                           |

**Table S5 (continued).** Derived H Atom Coordinates and Isotropic Displacement Parameters for Compound **2**.

| <b>Atom</b> | <b>x</b>  | <b>y</b>  | <b>z</b>  | <b><math>U_{\text{iso}} / \text{\AA}^2</math></b> |
|-------------|-----------|-----------|-----------|---------------------------------------------------|
| H25A        | 0.244149  | 0.645011  | -0.161785 | 0.064                                             |
| H25B        | 0.304255  | 0.582321  | -0.149076 | 0.064                                             |
| H26A        | 0.362495  | 0.729997  | -0.033089 | 0.052                                             |
| H26B        | 0.319172  | 0.628304  | -0.004339 | 0.052                                             |
| H31         | 0.631628  | 0.916577  | 0.145875  | 0.034                                             |
| H32A        | 0.695558  | 1.115.366 | 0.254992  | 0.052                                             |
| H32B        | 0.707848  | 1.025.918 | 0.282662  | 0.052                                             |
| H33A        | 0.862435  | 1.143.927 | 0.258798  | 0.071                                             |
| H33B        | 0.823318  | 1.031.962 | 0.197909  | 0.071                                             |
| H34A        | 0.872182  | 1.148.279 | 0.119415  | 0.068                                             |
| H34B        | 0.800949  | 1.193.970 | 0.152113  | 0.068                                             |
| H35A        | 0.731728  | 0.992800  | 0.045154  | 0.057                                             |
| H35B        | 0.720122  | 1.082.649 | 0.017546  | 0.057                                             |
| H36A        | 0.605853  | 1.077.818 | 0.102963  | 0.044                                             |
| H36B        | 0.565453  | 0.966369  | 0.040844  | 0.044                                             |
| H41         | 0.651752  | 0.789179  | 0.242932  | 0.031                                             |
| H42A        | 0.649377  | 0.684792  | 0.329912  | 0.048                                             |
| H42B        | 0.549049  | 0.592250  | 0.268009  | 0.048                                             |
| H43A        | 0.741639  | 0.680981  | 0.226342  | 0.068                                             |
| H43B        | 0.689135  | 0.570437  | 0.240525  | 0.068                                             |
| H44A        | 0.561453  | 0.510254  | 0.121026  | 0.066                                             |
| H44B        | 0.667665  | 0.559198  | 0.096093  | 0.066                                             |
| H45A        | 0.554015  | 0.611239  | 0.035962  | 0.050                                             |
| H45B        | 0.655420  | 0.706942  | 0.093678  | 0.050                                             |
| H46A        | 0.466089  | 0.620701  | 0.141245  | 0.040                                             |
| H46B        | 0.517779  | 0.730234  | 0.125341  | 0.040                                             |
| H51         | 0.113149  | 0.820373  | 0.439267  | 0.037                                             |
| H52A        | 0.051868  | 0.621189  | 0.331985  | 0.048                                             |
| H52B        | 0.022308  | 0.703249  | 0.308255  | 0.048                                             |
| H53A        | -0.077404 | 0.689929  | 0.407810  | 0.074                                             |
| H53B        | -0.113297 | 0.577556  | 0.349010  | 0.074                                             |
| H54A        | -0.094342 | 0.580460  | 0.490998  | 0.077                                             |
| H54B        | -0.020761 | 0.545153  | 0.449132  | 0.077                                             |
| H55A        | 0.068963  | 0.662396  | 0.579385  | 0.062                                             |
| H55B        | 0.039125  | 0.744165  | 0.555059  | 0.062                                             |
| H56A        | 0.205450  | 0.788090  | 0.539179  | 0.048                                             |
| H56B        | 0.169646  | 0.675943  | 0.480338  | 0.048                                             |
| H61         | 0.080559  | 0.945437  | 0.247510  | 0.032                                             |
| H62A        | -0.001461 | 0.767740  | 0.192999  | 0.055                                             |
| H62B        | 0.017991  | 0.777187  | 0.103203  | 0.055                                             |
| H63A        | -0.148313 | 0.745705  | 0.103862  | 0.075                                             |
| H63B        | -0.110385 | 0.840374  | 0.184890  | 0.075                                             |
| H64A        | -0.149035 | 0.889895  | 0.068748  | 0.065                                             |
| H64B        | -0.077248 | 0.855003  | 0.023139  | 0.065                                             |
| H65A        | 0.009067  | 1.033.017 | 0.079842  | 0.060                                             |
| H65B        | -0.009717 | 1.023.136 | 0.169777  | 0.060                                             |
| H66A        | 0.155916  | 1.054.828 | 0.167042  | 0.046                                             |
| H66B        | 0.116689  | 0.959444  | 0.086460  | 0.046                                             |
| H71         | 0.527564  | 1.234.556 | 0.230884  | 0.032                                             |
| H72A        | 0.336860  | 1.219.967 | 0.252103  | 0.047                                             |
| H72B        | 0.443100  | 1.298.121 | 0.314701  | 0.047                                             |

**Table S5 (continued).** Derived H Atom Coordinates and Isotropic Displacement Parameters for Compound **2**.

| <b>Atom</b> | <b>x</b> | <b>y</b>  | <b>z</b> | <b><math>U_{\text{iso}} / \text{\AA}^2</math></b> |
|-------------|----------|-----------|----------|---------------------------------------------------|
| H73A        | 0.388438 | 1.379.969 | 0.229606 | 0.065                                             |
| H73B        | 0.494229 | 1.386.895 | 0.216433 | 0.065                                             |
| H74A        | 0.388620 | 1.340.943 | 0.085947 | 0.061                                             |
| H74B        | 0.302894 | 1.246.094 | 0.106276 | 0.061                                             |
| H75A        | 0.495726 | 1.265.295 | 0.085709 | 0.054                                             |
| H75B        | 0.390693 | 1.186.789 | 0.021313 | 0.054                                             |
| H76A        | 0.337808 | 1.093.874 | 0.117834 | 0.044                                             |
| H76B        | 0.444811 | 1.103.022 | 0.106444 | 0.044                                             |

## STRUCTURE REPORT for Compound 3

**Crystallographer:** A. Fischer, P. Liebing

**ID code:** ULO

**Date:** 20 December 2016

**Compound:**  $(\text{C}_7\text{Si}_7\text{O}_{12})_2\text{U}$  (**3**)

**Formula sum:**  $\text{C}_{90}\text{H}_{170}\text{N}_2\text{O}_{24}\text{Si}_{14}\text{U}$  [+ solvent]

**Formula moieties:**  $\text{C}_{84}\text{H}_{154}\text{O}_{24}\text{Si}_{14}\text{U}$ ,  $\text{C}_6\text{H}_{16}\text{N}_2$ , [solvent]

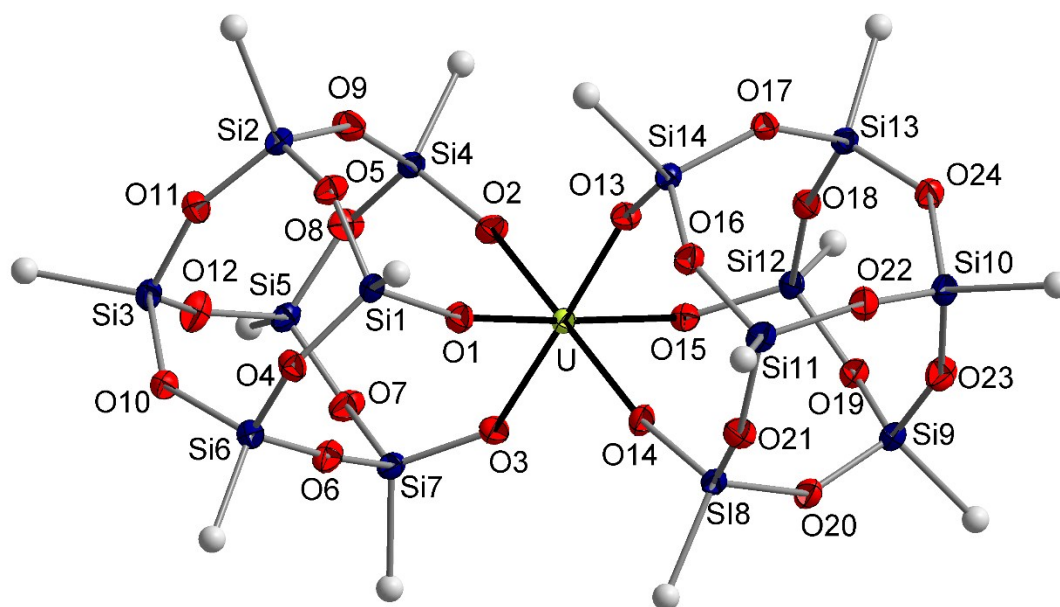

**Figure S4.** Molecular structure of **3** in the crystal showing the atom labeling scheme (displacement ellipsoids of U, Si and O drawn at the 50% probability level, H atoms and peripheral C atoms of the cyclohexyl groups omitted for clarity).

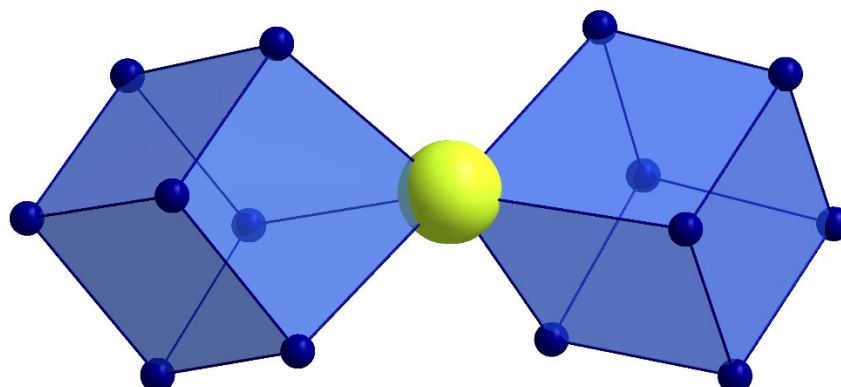

**Figure S5.** Representation of the interconnection of the two cube-shaped  $\text{Si}_7\text{U}$  frameworks in compound **3**.

## List of Tables

**Table S6.** Crystallographic Data and Details on Structure Refinement for Compound **3**.

**Table S7.** Atomic Coordinates and Equivalent Isotropic Displacement Parameters for Compound **3**.

**Table S8.** Selected Interatomic Distances for Compound **3**.

**Table S9.** Selected Interatomic Angles for Compound **3**.

**Table S10.** Derived H Atom Coordinates and Isotropic Displacement Parameters for Compound **3**.

**Table S6.** Crystallographic Data and Details on Structure Refinement for Compound **3**.

|                                                                                                                                                                                                                                                                                                                                                                                                                                                                                                                                                                                                                                                                                 |                                                                                                |
|---------------------------------------------------------------------------------------------------------------------------------------------------------------------------------------------------------------------------------------------------------------------------------------------------------------------------------------------------------------------------------------------------------------------------------------------------------------------------------------------------------------------------------------------------------------------------------------------------------------------------------------------------------------------------------|------------------------------------------------------------------------------------------------|
| formula sum                                                                                                                                                                                                                                                                                                                                                                                                                                                                                                                                                                                                                                                                     | C <sub>90</sub> H <sub>170</sub> N <sub>2</sub> O <sub>24</sub> Si <sub>14</sub> U [+ solvent] |
| formula weight                                                                                                                                                                                                                                                                                                                                                                                                                                                                                                                                                                                                                                                                  | 2295.56 [+ solvent]                                                                            |
| crystal color / shape / size (mm)                                                                                                                                                                                                                                                                                                                                                                                                                                                                                                                                                                                                                                               | colorless plates / 0.24 × 0.26 × 0.04                                                          |
| crystal system                                                                                                                                                                                                                                                                                                                                                                                                                                                                                                                                                                                                                                                                  | monoclinic                                                                                     |
| space group                                                                                                                                                                                                                                                                                                                                                                                                                                                                                                                                                                                                                                                                     | <i>P</i> 2 <sub>1</sub> / <i>c</i>                                                             |
| unit cell parameters                                                                                                                                                                                                                                                                                                                                                                                                                                                                                                                                                                                                                                                            |                                                                                                |
| <i>a</i> (Å)                                                                                                                                                                                                                                                                                                                                                                                                                                                                                                                                                                                                                                                                    | 25.601(1)                                                                                      |
| <i>b</i> (Å)                                                                                                                                                                                                                                                                                                                                                                                                                                                                                                                                                                                                                                                                    | 15.067(1)                                                                                      |
| <i>c</i> (Å)                                                                                                                                                                                                                                                                                                                                                                                                                                                                                                                                                                                                                                                                    | 30.835(1)                                                                                      |
| α (deg)                                                                                                                                                                                                                                                                                                                                                                                                                                                                                                                                                                                                                                                                         | 90                                                                                             |
| β (deg)                                                                                                                                                                                                                                                                                                                                                                                                                                                                                                                                                                                                                                                                         | 102.059(3)                                                                                     |
| γ (deg)                                                                                                                                                                                                                                                                                                                                                                                                                                                                                                                                                                                                                                                                         | 90                                                                                             |
| unit cell volume <i>V</i> (Å <sup>3</sup> )                                                                                                                                                                                                                                                                                                                                                                                                                                                                                                                                                                                                                                     | 11632(1)                                                                                       |
| molecules per cell <i>z</i>                                                                                                                                                                                                                                                                                                                                                                                                                                                                                                                                                                                                                                                     | 4                                                                                              |
| crystallographic density ρ <sub>calcd</sub> (g cm <sup>-3</sup> )                                                                                                                                                                                                                                                                                                                                                                                                                                                                                                                                                                                                               | 1.311                                                                                          |
| absorption coefficient μ (mm <sup>-1</sup> )                                                                                                                                                                                                                                                                                                                                                                                                                                                                                                                                                                                                                                    | 1.603                                                                                          |
| diffractometer                                                                                                                                                                                                                                                                                                                                                                                                                                                                                                                                                                                                                                                                  | Bruker Smart CCD System                                                                        |
| radiation (λ [Å])                                                                                                                                                                                                                                                                                                                                                                                                                                                                                                                                                                                                                                                               | graphite-monochromated Mo-K <sub>α</sub> (0.71073)                                             |
| temperature (°C)                                                                                                                                                                                                                                                                                                                                                                                                                                                                                                                                                                                                                                                                | -130(2)                                                                                        |
| scan type <sup>c</sup>                                                                                                                                                                                                                                                                                                                                                                                                                                                                                                                                                                                                                                                          | ω scans                                                                                        |
| completeness of dataset                                                                                                                                                                                                                                                                                                                                                                                                                                                                                                                                                                                                                                                         | 99.9%                                                                                          |
| θ range of data collection (deg)                                                                                                                                                                                                                                                                                                                                                                                                                                                                                                                                                                                                                                                | 1.424 ... 25.000                                                                               |
| reflections collected <sup>c</sup>                                                                                                                                                                                                                                                                                                                                                                                                                                                                                                                                                                                                                                              | 71138 (-23 ≤ <i>h</i> ≤ 32, -18 ≤ <i>k</i> ≤ 19, -39 ≤ <i>l</i> ≤ 25)                          |
| independent reflections                                                                                                                                                                                                                                                                                                                                                                                                                                                                                                                                                                                                                                                         | 25375 ( <i>R</i> <sub>int</sub> = 0.0513)                                                      |
| independent reflections with <i>I</i> > 2σ( <i>I</i> )                                                                                                                                                                                                                                                                                                                                                                                                                                                                                                                                                                                                                          | 18932                                                                                          |
| structure solution method                                                                                                                                                                                                                                                                                                                                                                                                                                                                                                                                                                                                                                                       | heavy atom methods (SHELXS-2013 <sup>d</sup> )                                                 |
| refinement method                                                                                                                                                                                                                                                                                                                                                                                                                                                                                                                                                                                                                                                               | full-matrix least-squares on <i>F</i> <sup>2</sup> (SHELXL-2016/4 <sup>d</sup> )               |
| absorption correction method <sup>c</sup>                                                                                                                                                                                                                                                                                                                                                                                                                                                                                                                                                                                                                                       | multi-scan                                                                                     |
| range of transmission factors                                                                                                                                                                                                                                                                                                                                                                                                                                                                                                                                                                                                                                                   | 0.76 ... 1.00                                                                                  |
| data / parameters / restraints                                                                                                                                                                                                                                                                                                                                                                                                                                                                                                                                                                                                                                                  | 25375 / 1323 / 307                                                                             |
| goodness of fit (GooF) [all data]                                                                                                                                                                                                                                                                                                                                                                                                                                                                                                                                                                                                                                               | 1.070                                                                                          |
| final <i>R</i> values                                                                                                                                                                                                                                                                                                                                                                                                                                                                                                                                                                                                                                                           |                                                                                                |
| <i>R</i> <sub>1</sub> [all data, <i>I</i> ≥ 2σ( <i>I</i> )]                                                                                                                                                                                                                                                                                                                                                                                                                                                                                                                                                                                                                     | 0.0707, 0.0415                                                                                 |
| <i>wR</i> <sub>2</sub> [all data, <i>I</i> ≥ 2σ( <i>I</i> )]                                                                                                                                                                                                                                                                                                                                                                                                                                                                                                                                                                                                                    | 0.0851, 0.0747                                                                                 |
| largest difference peak and hole                                                                                                                                                                                                                                                                                                                                                                                                                                                                                                                                                                                                                                                | 0.831 and -1.289 e Å <sup>-3</sup>                                                             |
| Refinement special details: Reflections (0 0 2) and (1 0 0) are strongly disagreeing with the structure model and were therefore omitted for refinement. The cyclohexyl groups C61–C66, C91–C96 and C111–C116 are disordered over each two orientations. The site occupancy factors of the disordered atoms were refined freely, and restraints on C-C distances and displacement parameters were applied on the same (SADI, SIMU and EADP restraints in ShelXL <sup>d</sup> ). C61 was refined as not disordered (EXYZ restraint in ShelXL <sup>d</sup> ). Diffuse solvent electron density was considered using the SQUEEZE routine of the software Platon <sup>e</sup> . The |                                                                                                |

solvent content of the crystals was calculated to approx. 0.5 molecules of *n*-hexane per formula unit.

<sup>c</sup> Bruker (2001). *AXS SMART and SADABS*. Bruker AXS Inc., Madison, Wisconsin, USA.

<sup>d</sup> G. M. Sheldrick, G. M. *Acta Cryst.* 2015, **C71**, 3–8.

<sup>e</sup> A. L. Spek, *Acta Cryst.* 2015, **C71**, 9-18.

**Table S7.** Atomic Coordinates and Equivalent Isotropic Displacement Parameters for Compound **3**.

| Atom | x           | y           | z           | $U_{eq} / \text{\AA}^2$ |
|------|-------------|-------------|-------------|-------------------------|
| U    | 0.26227(2)  | 0.55705(2)  | 0.26761(2)  | 0.01462(4)              |
| O1   | 0.28835(10) | 0.44085(16) | 0.23963(7)  | 0.0205(5)               |
| O2   | 0.19201(10) | 0.56336(17) | 0.21788(8)  | 0.0225(6)               |
| O3   | 0.29914(11) | 0.63986(16) | 0.22490(8)  | 0.0214(6)               |
| O4   | 0.32713(10) | 0.36802(15) | 0.17506(8)  | 0.0206(6)               |
| O5   | 0.22994(10) | 0.32364(16) | 0.18491(8)  | 0.0228(6)               |
| O6   | 0.33222(11) | 0.54116(15) | 0.16408(8)  | 0.0238(6)               |
| O7   | 0.25848(11) | 0.66575(17) | 0.13918(8)  | 0.0267(6)               |
| O8   | 0.16028(11) | 0.60196(17) | 0.13230(8)  | 0.0263(6)               |
| O9   | 0.15073(10) | 0.43818(17) | 0.16022(8)  | 0.0248(6)               |
| O10  | 0.30245(10) | 0.43773(17) | 0.09449(7)  | 0.0231(6)               |
| O11  | 0.20662(11) | 0.38388(16) | 0.10272(8)  | 0.0231(6)               |
| O12  | 0.22015(11) | 0.54719(16) | 0.07679(8)  | 0.0270(6)               |
| O13  | 0.22865(10) | 0.47179(15) | 0.30753(8)  | 0.0205(6)               |
| O14  | 0.33252(10) | 0.56841(16) | 0.31726(7)  | 0.0214(6)               |
| O15  | 0.23382(10) | 0.67276(15) | 0.30367(7)  | 0.0184(5)               |
| O16  | 0.29622(10) | 0.37583(16) | 0.36773(8)  | 0.0223(6)               |
| O17  | 0.20070(10) | 0.42203(15) | 0.38101(7)  | 0.0183(5)               |
| O18  | 0.19732(10) | 0.59790(15) | 0.37132(8)  | 0.0206(6)               |
| O19  | 0.27190(10) | 0.72251(16) | 0.38693(8)  | 0.0208(6)               |
| O20  | 0.36887(10) | 0.65694(16) | 0.39212(8)  | 0.0232(6)               |
| O21  | 0.38066(10) | 0.48273(16) | 0.38980(8)  | 0.0230(6)               |
| O22  | 0.32056(10) | 0.44630(17) | 0.44781(8)  | 0.0245(6)               |
| O23  | 0.31580(11) | 0.62120(16) | 0.45576(8)  | 0.0258(6)               |
| O24  | 0.22801(10) | 0.52601(16) | 0.45075(8)  | 0.0226(6)               |
| N1   | 0.28219(13) | 0.8268(2)   | 0.28420(10) | 0.0240(7)               |
| N2   | 0.17315(15) | 0.9152(2)   | 0.23013(10) | 0.0303(8)               |
| SI1  | 0.29004(4)  | 0.35103(6)  | 0.21145(3)  | 0.0168(2)               |
| SI2  | 0.18185(4)  | 0.35468(6)  | 0.14497(3)  | 0.0179(2)               |
| SI3  | 0.23869(4)  | 0.44515(7)  | 0.07400(3)  | 0.0202(2)               |
| SI4  | 0.14801(4)  | 0.54214(6)  | 0.17331(3)  | 0.0175(2)               |
| SI5  | 0.20504(4)  | 0.63141(7)  | 0.10502(3)  | 0.0198(2)               |
| SI6  | 0.34170(4)  | 0.44569(7)  | 0.14323(3)  | 0.0202(2)               |
| SI7  | 0.31213(4)  | 0.63895(7)  | 0.17569(3)  | 0.0193(2)               |
| SI8  | 0.37947(4)  | 0.57329(7)  | 0.36110(3)  | 0.0182(2)               |
| SI9  | 0.32717(4)  | 0.69525(7)  | 0.42075(3)  | 0.0191(2)               |
| SI10 | 0.29266(4)  | 0.52720(7)  | 0.46955(3)  | 0.0211(2)               |
| SI11 | 0.34523(4)  | 0.40635(7)  | 0.40739(3)  | 0.0202(2)               |
| SI12 | 0.21831(4)  | 0.68815(6)  | 0.35193(3)  | 0.0171(2)               |

**Table S7 (continued).** Atomic Coordinates and Equivalent Isotropic Displacement Parameters for Compound **3**.

| Atom | x           | y          | z            | $U_{\text{eq}} / \text{\AA}^2$ |
|------|-------------|------------|--------------|--------------------------------|
| SI13 | 0.18730(4)  | 0.51587(6) | 0.40276(3)   | 0.0170(2)                      |
| SI14 | 0.23401(4)  | 0.39211(6) | 0.34355(3)   | 0.0174(2)                      |
| C11  | 0.31649(15) | 0.2530(2)  | 0.24530(11)  | 0.0189(8)                      |
| C12  | 0.32516(18) | 0.1737(2)  | 0.21624(13)  | 0.0312(10)                     |
| C13  | 0.34065(19) | 0.0902(3)  | 0.24412(15)  | 0.0380(11)                     |
| C14  | 0.38965(19) | 0.1060(3)  | 0.28057(15)  | 0.0423(12)                     |
| C15  | 0.3821(2)   | 0.1847(3)  | 0.30918(14)  | 0.0443(12)                     |
| C16  | 0.36665(18) | 0.2686(3)  | 0.28138(13)  | 0.0327(10)                     |
| C21  | 0.13248(16) | 0.2641(2)  | 0.12905(12)  | 0.0234(8)                      |
| C22  | 0.0871(2)   | 0.2935(3)  | 0.09083(16)  | 0.0472(14)                     |
| C23  | 0.0464(2)   | 0.2188(3)  | 0.07632(18)  | 0.0582(16)                     |
| C24  | 0.0731(2)   | 0.1364(4)  | 0.06443(17)  | 0.0623(17)                     |
| C25  | 0.1157(2)   | 0.1058(3)  | 0.10298(19)  | 0.0570(15)                     |
| C26  | 0.15774(19) | 0.1784(3)  | 0.11759(16)  | 0.0409(11)                     |
| C31  | 0.22325(17) | 0.4045(3)  | 0.01580(11)  | 0.0251(9)                      |
| C32  | 0.16711(19) | 0.4300(3)  | -0.00832(13) | 0.0383(11)                     |
| C33  | 0.1528(2)   | 0.3907(3)  | -0.05501(14) | 0.0437(13)                     |
| C34  | 0.1585(2)   | 0.2908(3)  | -0.05348(14) | 0.0397(12)                     |
| C35  | 0.2151(2)   | 0.2649(3)  | -0.03264(14) | 0.0460(13)                     |
| C36  | 0.2313(2)   | 0.3036(3)  | 0.01468(13)  | 0.0410(12)                     |
| C41  | 0.07975(15) | 0.5620(2)  | 0.18280(12)  | 0.0233(8)                      |
| C42  | 0.06798(18) | 0.4940(3)  | 0.21751(14)  | 0.0348(10)                     |
| C43  | 0.01344(19) | 0.5093(3)  | 0.22912(16)  | 0.0430(12)                     |
| C44  | 0.00889(19) | 0.6022(3)  | 0.24593(15)  | 0.0414(11)                     |
| C45  | 0.0173(2)   | 0.6705(3)  | 0.21070(17)  | 0.0477(13)                     |
| C46  | 0.07220(18) | 0.6569(3)  | 0.19779(15)  | 0.0355(10)                     |
| C51  | 0.17679(16) | 0.7214(2)  | 0.06592(11)  | 0.0215(8)                      |
| C52  | 0.15159(19) | 0.7959(2)  | 0.08849(13)  | 0.0335(11)                     |
| C53  | 0.1250(2)   | 0.8679(3)  | 0.05647(14)  | 0.0385(11)                     |
| C54  | 0.0843(2)   | 0.8291(3)  | 0.01865(15)  | 0.0443(12)                     |
| C55  | 0.1107(2)   | 0.7599(3)  | -0.00535(14) | 0.0572(17)                     |
| C56  | 0.1366(2)   | 0.6856(3)  | 0.02617(14)  | 0.0419(12)                     |
| C61A | 0.41163(16) | 0.4319(3)  | 0.13868(12)  | 0.0379(10)                     |
| C61B | 0.41163(16) | 0.4319(3)  | 0.13868(12)  | 0.0379(10)                     |
| C62A | 0.4551(5)   | 0.4153(14) | 0.1789(4)    | 0.0359(18)                     |
| C62B | 0.4480(3)   | 0.4344(9)  | 0.1847(3)    | 0.0359(18)                     |
| C63A | 0.5101(6)   | 0.3895(11) | 0.1733(5)    | 0.046(3)                       |
| C63B | 0.5065(4)   | 0.4264(6)  | 0.1812(3)    | 0.040(2)                       |
| C64A | 0.5270(4)   | 0.4447(10) | 0.1382(3)    | 0.056(3)                       |
| C64B | 0.5154(3)   | 0.3471(6)  | 0.1533(3)    | 0.055(2)                       |
| C65A | 0.4868(3)   | 0.4423(10) | 0.0957(3)    | 0.048(3)                       |
| C65B | 0.4789(3)   | 0.3486(7)  | 0.1080(2)    | 0.056(2)                       |
| C66A | 0.4315(4)   | 0.4668(8)  | 0.1003(3)    | 0.040(3)                       |
| C66B | 0.4203(3)   | 0.3561(5)  | 0.1101(2)    | 0.0416(19)                     |
| C71  | 0.36562(16) | 0.7196(2)  | 0.17043(12)  | 0.0215(8)                      |
| C72  | 0.41821(18) | 0.7019(3)  | 0.20413(15)  | 0.0360(11)                     |
| C73  | 0.4629(2)   | 0.7657(3)  | 0.19746(19)  | 0.0551(15)                     |
| C74  | 0.4718(2)   | 0.7614(3)  | 0.1503(2)    | 0.0600(16)                     |
| C75  | 0.4207(2)   | 0.7803(3)  | 0.11657(18)  | 0.0502(14)                     |
| C76  | 0.37581(18) | 0.7180(3)  | 0.12277(13)  | 0.0310(10)                     |
| C81  | 0.44491(16) | 0.5896(3)  | 0.34573(12)  | 0.0252(9)                      |



**Table S7 (continued).** Atomic Coordinates and Equivalent Isotropic Displacement Parameters for Compound **3**.

| Atom | x           | y          | z           | $U_{\text{eq}} / \text{\AA}^2$ |
|------|-------------|------------|-------------|--------------------------------|
| C82  | 0.49196(19) | 0.5888(4)  | 0.38564(16) | 0.0607(17)                     |
| C83  | 0.5456(2)   | 0.6047(5)  | 0.37181(19) | 0.0719(19)                     |
| C84  | 0.55449(18) | 0.5391(3)  | 0.33727(15) | 0.0426(12)                     |
| C85  | 0.50863(19) | 0.5404(4)  | 0.29737(15) | 0.0462(13)                     |
| C86  | 0.45522(18) | 0.5239(3)  | 0.31057(14) | 0.0347(10)                     |
| C91A | 0.3552(5)   | 0.8003(16) | 0.4493(7)   | 0.027(3)                       |
| C91B | 0.3571(7)   | 0.7905(17) | 0.4536(8)   | 0.026(3)                       |
| C92A | 0.3196(9)   | 0.8364(16) | 0.4791(7)   | 0.030(3)                       |
| C92B | 0.3249(11)  | 0.8261(17) | 0.4862(8)   | 0.031(4)                       |
| C93A | 0.3429(6)   | 0.9196(15) | 0.5040(7)   | 0.0414(16)                     |
| C93B | 0.3486(7)   | 0.9107(16) | 0.5096(8)   | 0.0414(16)                     |
| C94A | 0.4030(3)   | 0.9183(6)  | 0.5235(3)   | 0.041(2)                       |
| C94B | 0.3672(4)   | 0.9786(6)  | 0.4791(3)   | 0.043(2)                       |
| C95A | 0.4342(4)   | 0.8897(5)  | 0.4888(3)   | 0.040(2)                       |
| C95B | 0.4059(4)   | 0.9367(5)  | 0.4535(3)   | 0.044(2)                       |
| C96A | 0.4148(3)   | 0.7995(5)  | 0.4693(3)   | 0.035(2)                       |
| C96B | 0.3793(4)   | 0.8587(5)  | 0.4258(3)   | 0.033(2)                       |
| C101 | 0.30593(16) | 0.5137(2)  | 0.53081(11) | 0.0214(8)                      |
| C102 | 0.28291(18) | 0.4248(2)  | 0.54335(12) | 0.0290(10)                     |
| C103 | 0.29216(18) | 0.4117(3)  | 0.59344(12) | 0.0305(10)                     |
| C104 | 0.26905(19) | 0.4894(3)  | 0.61520(13) | 0.0352(10)                     |
| C105 | 0.29260(19) | 0.5770(3)  | 0.60417(13) | 0.0348(11)                     |
| C106 | 0.28367(18) | 0.5903(3)  | 0.55386(12) | 0.0293(9)                      |
| C111 | 0.3898(7)   | 0.3127(15) | 0.4225(7)   | 0.028(3)                       |
| C112 | 0.4465(6)   | 0.3342(10) | 0.4491(4)   | 0.053(3)                       |
| C113 | 0.4449(5)   | 0.3431(7)  | 0.4988(3)   | 0.063(3)                       |
| C114 | 0.4219(4)   | 0.2585(6)  | 0.5158(3)   | 0.061(3)                       |
| C115 | 0.3671(4)   | 0.2376(7)  | 0.4862(3)   | 0.054(3)                       |
| C116 | 0.3661(9)   | 0.2263(11) | 0.4361(4)   | 0.045(3)                       |
| C121 | 0.16580(16) | 0.7751(2)  | 0.34842(12) | 0.0212(8)                      |
| C122 | 0.10978(18) | 0.7384(3)  | 0.32866(15) | 0.0369(11)                     |
| C123 | 0.06566(19) | 0.8086(3)  | 0.32523(14) | 0.0429(12)                     |
| C124 | 0.06588(19) | 0.8502(3)  | 0.36979(14) | 0.0419(12)                     |
| C125 | 0.1197(2)   | 0.8879(3)  | 0.38985(16) | 0.0497(14)                     |
| C126 | 0.16481(19) | 0.8193(3)  | 0.39318(14) | 0.0399(12)                     |
| C131 | 0.11660(15) | 0.5130(2)  | 0.40774(12) | 0.0206(8)                      |
| C132 | 0.08068(16) | 0.4938(3)  | 0.36203(12) | 0.0291(9)                      |
| C133 | 0.02143(18) | 0.4909(3)  | 0.36364(14) | 0.0425(12)                     |
| C134 | 0.01129(19) | 0.4227(3)  | 0.39678(15) | 0.0483(13)                     |
| C135 | 0.04564(19) | 0.4394(4)  | 0.44273(14) | 0.0497(13)                     |
| C136 | 0.10506(17) | 0.4455(3)  | 0.44176(13) | 0.0326(9)                      |
| C141 | 0.20678(15) | 0.2886(2)  | 0.31533(12) | 0.0204(8)                      |
| C142 | 0.14644(18) | 0.2934(3)  | 0.29675(16) | 0.0394(11)                     |
| C143 | 0.1263(2)   | 0.2098(3)  | 0.27072(17) | 0.0542(15)                     |
| C144 | 0.1389(2)   | 0.1277(3)  | 0.29889(17) | 0.0465(13)                     |
| C145 | 0.1990(2)   | 0.1201(3)  | 0.31775(15) | 0.0389(11)                     |
| C146 | 0.22083(19) | 0.2037(2)  | 0.34292(14) | 0.0328(10)                     |
| C211 | 0.3902(8)   | 0.3071(15) | 0.4252(7)   | 0.043(4)                       |
| C212 | 0.4363(5)   | 0.3297(9)  | 0.4638(4)   | 0.057(3)                       |
| C213 | 0.4733(4)   | 0.2498(6)  | 0.4755(4)   | 0.067(3)                       |
| C214 | 0.4429(4)   | 0.1689(7)  | 0.4864(4)   | 0.067(3)                       |

**Table S7 (continued).** Atomic Coordinates and Equivalent Isotropic Displacement Parameters for Compound **3**.

| Atom | x           | y          | z           | $U_{eq} / \text{\AA}^2$ |
|------|-------------|------------|-------------|-------------------------|
| C215 | 0.3970(4)   | 0.1474(6)  | 0.4487(4)   | 0.071(3)                |
| C216 | 0.3615(8)   | 0.2303(10) | 0.4419(6)   | 0.065(4)                |
| C301 | 0.26373(18) | 0.8457(3)  | 0.23526(13) | 0.0313(10)              |
| C302 | 0.20350(19) | 0.8395(3)  | 0.21980(13) | 0.0330(10)              |
| C303 | 0.34046(18) | 0.8058(3)  | 0.29514(15) | 0.0355(10)              |
| C304 | 0.27007(19) | 0.9029(2)  | 0.31192(13) | 0.0297(10)              |
| C305 | 0.1833(2)   | 0.9942(3)  | 0.20517(15) | 0.0406(11)              |
| C306 | 0.11625(19) | 0.8945(3)  | 0.21950(15) | 0.0444(12)              |

**Table S8.** Selected Interatomic Distances (pm) for Compound **2**.

| Atom 1 | Atom 2 | Distance | Atom 1 | Atom 2 | Distance |
|--------|--------|----------|--------|--------|----------|
| U      | O1     | 212.0(2) | SI7    | O3     | 162.0(3) |
| U      | O2     | 210.8(2) | SI7    | O6     | 162.5(3) |
| U      | O3     | 216.8(2) | SI7    | O7     | 163.4(3) |
| U      | O13    | 208.5(2) | SI8    | O14    | 161.2(2) |
| U      | O14    | 211.1(2) | SI8    | O20    | 163.9(3) |
| U      | O15    | 226.8(2) | SI8    | O21    | 162.3(3) |
| SI1    | O1     | 161.4(2) | SI9    | O19    | 162.5(3) |
| SI1    | O4     | 163.4(3) | SI9    | O20    | 162.7(3) |
| SI1    | O5     | 163.8(3) | SI9    | O23    | 162.0(3) |
| SI2    | O5     | 161.8(3) | SI10   | O22    | 162.6(3) |
| SI2    | O9     | 161.1(3) | SI10   | O23    | 162.6(3) |
| SI2    | O11    | 162.4(3) | SI10   | O24    | 163.5(3) |
| SI3    | O10    | 162.6(3) | SI11   | O16    | 162.5(3) |
| SI3    | O11    | 161.7(3) | SI11   | O21    | 162.7(3) |
| SI3    | O12    | 161.7(3) | SI11   | O22    | 162.6(3) |
| SI4    | O2     | 161.6(2) | SI12   | O15    | 163.5(3) |
| SI4    | O8     | 163.6(3) | SI12   | O18    | 162.2(3) |
| SI4    | O9     | 162.3(3) | SI12   | O19    | 164.2(3) |
| SI5    | O7     | 162.7(3) | SI13   | O17    | 163.2(2) |
| SI5    | O8     | 161.9(3) | SI13   | O18    | 162.4(3) |
| SI5    | O12    | 163.0(3) | SI13   | O24    | 162.9(3) |
| SI6    | O4     | 162.0(3) | SI14   | O13    | 162.2(2) |
| SI6    | O6     | 161.5(3) | SI14   | O16    | 163.0(3) |
| SI6    | O10    | 162.8(2) | SI14   | O17    | 163.6(3) |

**Table S9.** Selected Interatomic Angles (deg.) for Compound **3**.

| Atom 1 | Atom 2 | Atom 3 | Angle      | Atom 1 | Atom 2 | Atom 3 | Angle      |
|--------|--------|--------|------------|--------|--------|--------|------------|
| O1     | U      | O2     | 91.99(9)   | O4     | SI1    | O5     | 108.44(13) |
| O1     | U      | O3     | 90.80(9)   | O5     | SI2    | O9     | 110.35(14) |
| O1     | U      | O13    | 86.30(9)   | O5     | SI2    | O11    | 109.04(15) |
| O1     | U      | O14    | 93.96(9)   | O9     | SI2    | O11    | 108.80(14) |
| O1     | U      | O15    | 174.14(9)  | O10    | SI3    | O11    | 109.35(14) |
| O2     | U      | O3     | 86.89(10)  | O10    | SI3    | O12    | 109.07(14) |
| O2     | U      | O13    | 93.59(10)  | O11    | SI3    | O12    | 108.99(15) |
| O2     | U      | O14    | 172.76(9)  | O2     | SI4    | O8     | 109.63(14) |
| O2     | U      | O15    | 90.54(9)   | O2     | SI4    | O9     | 110.12(14) |
| O3     | U      | O13    | 177.07(9)  | O8     | SI4    | O9     | 108.32(14) |
| O3     | U      | O14    | 88.90(9)   | O7     | SI5    | O8     | 109.97(14) |
| O3     | U      | O15    | 94.62(9)   | O7     | SI5    | O12    | 109.39(15) |
| O13    | U      | O14    | 90.91(10)  | O8     | SI5    | O12    | 109.67(15) |
| O13    | U      | O15    | 88.27(9)   | O4     | SI6    | O6     | 109.23(13) |
| O14    | U      | O15    | 83.94(9)   | O4     | SI6    | O10    | 109.28(14) |
| U      | O1     | SI1    | 163.27(16) | O6     | SI6    | O10    | 108.55(14) |
| U      | O2     | SI4    | 161.21(16) | O3     | SI7    | O6     | 110.51(13) |
| U      | O3     | SI7    | 139.88(14) | O3     | SI7    | O7     | 109.62(15) |
| SI1    | O4     | SI6    | 140.30(16) | O6     | SI7    | O7     | 109.36(14) |
| SI1    | O5     | SI2    | 142.54(17) | O14    | SI8    | O20    | 109.83(14) |
| SI6    | O6     | SI7    | 167.52(18) | O14    | SI8    | O21    | 110.16(14) |
| SI5    | O7     | SI7    | 147.08(18) | O20    | SI8    | O21    | 108.35(14) |
| SI4    | O8     | SI5    | 145.47(19) | O19    | SI9    | O20    | 108.87(13) |
| SI2    | O9     | SI4    | 151.17(18) | O19    | SI9    | O23    | 110.36(15) |
| SI3    | O10    | SI6    | 136.81(16) | O20    | SI9    | O23    | 110.30(14) |
| SI2    | O11    | SI3    | 157.21(18) | O22    | SI10   | O23    | 109.26(15) |
| SI3    | O12    | SI5    | 150.89(17) | O22    | SI10   | O24    | 110.16(14) |
| U      | O13    | SI14   | 150.93(16) | O23    | SI10   | O24    | 108.30(14) |
| U      | O14    | SI8    | 169.99(16) | O16    | SI11   | O21    | 110.24(14) |
| U      | O15    | SI12   | 135.98(13) | O16    | SI11   | O22    | 108.61(14) |
| SI11   | O16    | SI14   | 145.98(17) | O21    | SI11   | O22    | 109.07(14) |
| SI13   | O17    | SI14   | 135.59(16) | O15    | SI12   | O18    | 112.27(13) |
| SI12   | O18    | SI13   | 164.61(17) | O15    | SI12   | O19    | 108.33(14) |
| SI9    | O19    | SI12   | 146.91(16) | O18    | SI12   | O19    | 108.53(13) |
| SI8    | O20    | SI9    | 142.86(18) | O17    | SI13   | O18    | 109.94(13) |
| SI8    | O21    | SI11   | 145.90(18) | O17    | SI13   | O24    | 107.76(13) |
| SI10   | O22    | SI11   | 150.19(18) | O18    | SI13   | O24    | 108.66(14) |
| SI9    | O23    | SI10   | 154.17(17) | O13    | SI14   | O16    | 111.06(14) |
| SI10   | O24    | SI13   | 136.96(17) | O13    | SI14   | O17    | 107.31(13) |
| O1     | SI1    | O4     | 108.85(13) | O16    | SI14   | O17    | 108.79(13) |
| O1     | SI1    | O5     | 110.63(14) |        |        |        |            |

**Table S10.** Derived H Atom Coordinates and Isotropic Displacement Parameters for Compound **3**.

| <b>Atom</b> | <b>x</b> | <b>y</b>  | <b>z</b> | <b><math>U_{\text{iso}} / \text{\AA}^2</math></b> |
|-------------|----------|-----------|----------|---------------------------------------------------|
| H01R        | 0.280848 | 0.802926  | 0.218217 | 0.038                                             |
| H01S        | 0.275520 | 0.906035  | 0.228912 | 0.038                                             |
| H02A        | 0.244077 | 0.423005  | 0.530629 | 0.035                                             |
| H02B        | 0.299840 | 0.375308  | 0.530232 | 0.035                                             |
| H02R        | 0.195243 | 0.830919  | 0.187246 | 0.040                                             |
| H02S        | 0.191025 | 0.785947  | 0.233245 | 0.040                                             |
| H03A        | 0.330955 | 0.406986  | 0.605923 | 0.037                                             |
| H03B        | 0.275031 | 0.355808  | 0.599969 | 0.037                                             |
| H03R        | 0.347265 | 0.752596  | 0.278920 | 0.043                                             |
| H03S        | 0.351799 | 0.795303  | 0.327084 | 0.043                                             |
| H03T        | 0.360579 | 0.855901  | 0.286583 | 0.043                                             |
| H04A        | 0.229771 | 0.490718  | 0.604733 | 0.042                                             |
| H04B        | 0.276863 | 0.480959  | 0.647759 | 0.042                                             |
| H04R        | 0.232799 | 0.921141  | 0.301633 | 0.036                                             |
| H04S        | 0.293695 | 0.952833  | 0.309186 | 0.036                                             |
| H04T        | 0.275818 | 0.884390  | 0.343023 | 0.036                                             |
| H05A        | 0.331369 | 0.577964  | 0.617185 | 0.042                                             |
| H05B        | 0.275697 | 0.626380  | 0.617390 | 0.042                                             |
| H05R        | 0.161590 | 1.043.775 | 0.212092 | 0.049                                             |
| H05S        | 0.173779 | 0.981573  | 0.173318 | 0.049                                             |
| H05T        | 0.221182 | 1.010.012 | 0.213464 | 0.049                                             |
| H06A        | 0.244906 | 0.596016  | 0.541465 | 0.035                                             |
| H06B        | 0.301070 | 0.646220  | 0.547696 | 0.035                                             |
| H06R        | 0.095978 | 0.945260  | 0.227146 | 0.053                                             |
| H06S        | 0.109383 | 0.842406  | 0.236490 | 0.053                                             |
| H06T        | 0.105140 | 0.881992  | 0.187717 | 0.053                                             |
| H101        | 0.345515 | 0.512202  | 0.541918 | 0.026                                             |
| H11         | 0.287876 | 0.234560  | 0.261094 | 0.023                                             |
| H111        | 0.397427 | 0.295834  | 0.393046 | 0.034                                             |
| H121        | 0.173667 | 0.822479  | 0.327978 | 0.025                                             |
| H12A        | 0.353738 | 0.188229  | 0.200170 | 0.037                                             |
| H12B        | 0.291946 | 0.162275  | 0.193974 | 0.037                                             |
| H12K        | 0.459244 | 0.390412  | 0.438278 | 0.064                                             |
| H12L        | 0.471468 | 0.286303  | 0.445051 | 0.064                                             |
| H12M        | 0.456683 | 0.380477  | 0.455504 | 0.068                                             |
| H12N        | 0.421856 | 0.347167  | 0.489934 | 0.068                                             |
| H131        | 0.107112 | 0.573249  | 0.417334 | 0.025                                             |
| H13A        | 0.348010 | 0.041445  | 0.224740 | 0.046                                             |
| H13B        | 0.310431 | 0.071895  | 0.257538 | 0.046                                             |
| H13K        | 0.481486 | 0.353546  | 0.516249 | 0.076                                             |
| H13L        | 0.422593 | 0.394747  | 0.503067 | 0.076                                             |
| H13M        | 0.490172 | 0.235938  | 0.450214 | 0.081                                             |
| H13N        | 0.501969 | 0.264703  | 0.501344 | 0.081                                             |
| H141        | 0.223768 | 0.282183  | 0.289089 | 0.024                                             |
| H14A        | 0.420948 | 0.116723  | 0.267089 | 0.051                                             |
| H14B        | 0.396941 | 0.052299  | 0.299346 | 0.051                                             |
| H14K        | 0.446522 | 0.208119  | 0.515204 | 0.073                                             |
| H14L        | 0.418069 | 0.267393  | 0.546788 | 0.073                                             |
| H14M        | 0.467427 | 0.117379  | 0.492113 | 0.080                                             |
| H14N        | 0.429206 | 0.180401  | 0.513583 | 0.080                                             |
| H15A        | 0.353759 | 0.170803  | 0.325635 | 0.053                                             |

**Table S10 (continued).** Derived H Atom Coordinates and Isotropic Displacement Parameters for Compound **3**.

| Atom | x         | y        | z         | $U_{\text{iso}} / \text{\AA}^2$ |
|------|-----------|----------|-----------|---------------------------------|
| H15B | 0.415617  | 0.195612 | 0.331125  | 0.053                           |
| H15K | 0.342077  | 0.285914 | 0.489775  | 0.064                           |
| H15L | 0.353398  | 0.182276 | 0.497178  | 0.064                           |
| H15M | 0.376744  | 0.095622 | 0.456155  | 0.085                           |
| H15N | 0.410090  | 0.133742 | 0.421409  | 0.085                           |
| H16A | 0.360067  | 0.317635 | 0.300912  | 0.039                           |
| H16B | 0.396562  | 0.286211 | 0.267419  | 0.039                           |
| H16K | 0.387853  | 0.174633 | 0.430955  | 0.054                           |
| H16L | 0.329062  | 0.217892 | 0.419188  | 0.054                           |
| H16M | 0.328085  | 0.217183 | 0.420217  | 0.078                           |
| H16N | 0.352001  | 0.246841 | 0.470345  | 0.078                           |
| H21  | 0.116275  | 0.251742 | 0.155256  | 0.028                           |
| H211 | 0.405167  | 0.286508 | 0.399489  | 0.051                           |
| H22A | 0.102325  | 0.311954 | 0.065259  | 0.057                           |
| H22B | 0.068622  | 0.345419 | 0.100407  | 0.057                           |
| H22K | 0.109485  | 0.714438 | 0.298714  | 0.044                           |
| H22L | 0.101974  | 0.688805 | 0.347381  | 0.044                           |
| H23A | 0.019301  | 0.238671 | 0.050375  | 0.070                           |
| H23B | 0.027901  | 0.205354 | 0.100702  | 0.070                           |
| H23K | 0.071086  | 0.855290 | 0.304011  | 0.051                           |
| H23L | 0.030498  | 0.780623 | 0.313766  | 0.051                           |
| H24A | 0.046180  | 0.088914 | 0.056029  | 0.075                           |
| H24B | 0.089419  | 0.148520 | 0.038613  | 0.075                           |
| H24K | 0.038797  | 0.898047 | 0.366234  | 0.050                           |
| H24L | 0.056148  | 0.804913 | 0.389972  | 0.050                           |
| H25A | 0.098956  | 0.090001 | 0.128142  | 0.068                           |
| H25B | 0.133212  | 0.051962 | 0.094331  | 0.068                           |
| H25K | 0.119209  | 0.910638 | 0.419884  | 0.060                           |
| H25L | 0.127117  | 0.938598 | 0.371612  | 0.060                           |
| H26A | 0.176941  | 0.189746 | 0.093406  | 0.049                           |
| H26B | 0.184118  | 0.157540 | 0.143801  | 0.049                           |
| H26K | 0.160259  | 0.772940 | 0.414846  | 0.048                           |
| H26L | 0.199521  | 0.848927 | 0.404394  | 0.048                           |
| H31  | 0.249104  | 0.432912 | -0.000180 | 0.030                           |
| H32A | 0.141085  | 0.408843 | 0.009026  | 0.046                           |
| H32B | 0.164379  | 0.495464 | -0.010283 | 0.046                           |
| H32K | 0.086444  | 0.540298 | 0.340847  | 0.035                           |
| H32L | 0.091122  | 0.436107 | 0.350986  | 0.035                           |
| H33A | 0.176583  | 0.415997 | -0.073357 | 0.052                           |
| H33B | 0.115554  | 0.406668 | -0.068938 | 0.052                           |
| H33K | 0.009941  | 0.550053 | 0.372022  | 0.051                           |
| H33L | 0.000155  | 0.475981 | 0.333882  | 0.051                           |
| H34A | 0.148920  | 0.266496 | -0.083943 | 0.048                           |
| H34B | 0.133782  | 0.265239 | -0.036060 | 0.048                           |
| H34K | 0.019130  | 0.362781 | 0.386566  | 0.058                           |
| H34L | -0.026885 | 0.424337 | 0.398493  | 0.058                           |
| H35A | 0.218137  | 0.199445 | -0.031355 | 0.055                           |
| H35B | 0.239619  | 0.287449 | -0.051056 | 0.055                           |
| H35K | 0.040132  | 0.390637 | 0.462821  | 0.060                           |
| H35L | 0.034179  | 0.495425 | 0.454694  | 0.060                           |
| H36A | 0.269389  | 0.289755 | 0.026823  | 0.049                           |

**Table S10 (continued).** Derived H Atom Coordinates and Isotropic Displacement Parameters for Compound **3**.

| Atom | x         | y        | z         | $U_{\text{iso}} / \text{\AA}^2$ |
|------|-----------|----------|-----------|---------------------------------|
| H36B | 0.209869  | 0.274750 | 0.033928  | 0.049                           |
| H36K | 0.117844  | 0.386347 | 0.434655  | 0.039                           |
| H36L | 0.125259  | 0.462515 | 0.471585  | 0.039                           |
| H41  | 0.053709  | 0.551456 | 0.154240  | 0.028                           |
| H42A | 0.096126  | 0.498659 | 0.244830  | 0.042                           |
| H42B | 0.069231  | 0.433231 | 0.205594  | 0.042                           |
| H42K | 0.127607  | 0.300720 | 0.321487  | 0.047                           |
| H42L | 0.138344  | 0.345785 | 0.277106  | 0.047                           |
| H43A | 0.008339  | 0.466194 | 0.252111  | 0.052                           |
| H43B | -0.015037 | 0.499194 | 0.202459  | 0.052                           |
| H43K | 0.087208  | 0.214164 | 0.259753  | 0.065                           |
| H43L | 0.143159  | 0.204975 | 0.244684  | 0.065                           |
| H44A | -0.026861 | 0.610758 | 0.252801  | 0.050                           |
| H44B | 0.036019  | 0.611454 | 0.273552  | 0.050                           |
| H44K | 0.126439  | 0.074628 | 0.280766  | 0.056                           |
| H44L | 0.119650  | 0.130115 | 0.323572  | 0.056                           |
| H45A | -0.011547 | 0.664214 | 0.183969  | 0.057                           |
| H45B | 0.015459  | 0.731230 | 0.222512  | 0.057                           |
| H45K | 0.205905  | 0.068374 | 0.337959  | 0.047                           |
| H45L | 0.217795  | 0.109945 | 0.293195  | 0.047                           |
| H46A | 0.101038  | 0.671242 | 0.223610  | 0.043                           |
| H46B | 0.075210  | 0.698370 | 0.173539  | 0.043                           |
| H46K | 0.260161  | 0.198815 | 0.352042  | 0.039                           |
| H46L | 0.206242  | 0.208262 | 0.370149  | 0.039                           |
| H51  | 0.206999  | 0.747967 | 0.054390  | 0.026                           |
| H52A | 0.179622  | 0.823539 | 0.111532  | 0.040                           |
| H52B | 0.124565  | 0.769858 | 0.103487  | 0.040                           |
| H53A | 0.152672  | 0.899855 | 0.044432  | 0.046                           |
| H53B | 0.107280  | 0.911293 | 0.072727  | 0.046                           |
| H54A | 0.054920  | 0.801481 | 0.030263  | 0.053                           |
| H54B | 0.068972  | 0.876788 | -0.002252 | 0.053                           |
| H55A | 0.083713  | 0.733825 | -0.029708 | 0.069                           |
| H55B | 0.138429  | 0.788776 | -0.018622 | 0.069                           |
| H56A | 0.154822  | 0.643532 | 0.009641  | 0.050                           |
| H56B | 0.108267  | 0.652657 | 0.036855  | 0.050                           |
| H61A | 0.408090  | 0.368876 | 0.128369  | 0.045                           |
| H61B | 0.420603  | 0.486391 | 0.123181  | 0.045                           |
| H62A | 0.458796  | 0.469816 | 0.197257  | 0.043                           |
| H62B | 0.442351  | 0.367902 | 0.196425  | 0.043                           |
| H62C | 0.442520  | 0.490762 | 0.199651  | 0.043                           |
| H62D | 0.438681  | 0.384851 | 0.202838  | 0.043                           |
| H63A | 0.510267  | 0.326049 | 0.164996  | 0.055                           |
| H63B | 0.535936  | 0.397538 | 0.201779  | 0.055                           |
| H63C | 0.529074  | 0.420332 | 0.211315  | 0.047                           |
| H63D | 0.517378  | 0.481256 | 0.167804  | 0.047                           |
| H64A | 0.561655  | 0.422547 | 0.133138  | 0.068                           |
| H64B | 0.532186  | 0.506889 | 0.148653  | 0.068                           |
| H64C | 0.509238  | 0.291859 | 0.168847  | 0.066                           |
| H64D | 0.553021  | 0.346938 | 0.149847  | 0.066                           |
| H65A | 0.498241  | 0.483604 | 0.074518  | 0.058                           |
| H65B | 0.486072  | 0.381807 | 0.083134  | 0.058                           |

**Table S10 (continued).** Derived H Atom Coordinates and Isotropic Displacement Parameters for Compound **3**.

| <b>Atom</b> | <b>x</b> | <b>y</b>  | <b>z</b> | <b><math>U_{\text{iso}} / \text{\AA}^2</math></b> |
|-------------|----------|-----------|----------|---------------------------------------------------|
| H65C        | 0.488678 | 0.399424  | 0.091001 | 0.067                                             |
| H65D        | 0.484304 | 0.293564  | 0.091994 | 0.067                                             |
| H66A        | 0.406532 | 0.447135  | 0.072978 | 0.048                                             |
| H66B        | 0.429536 | 0.532379  | 0.101123 | 0.048                                             |
| H66C        | 0.408501 | 0.300410  | 0.122062 | 0.050                                             |
| H66D        | 0.398693 | 0.364833  | 0.079778 | 0.050                                             |
| H71         | 0.352912 | 0.780398  | 0.176207 | 0.026                                             |
| H72A        | 0.412023 | 0.708900  | 0.234582 | 0.043                                             |
| H72B        | 0.429680 | 0.639919  | 0.200832 | 0.043                                             |
| H73A        | 0.496525 | 0.750018  | 0.218395 | 0.066                                             |
| H73B        | 0.453302 | 0.827150  | 0.204091 | 0.066                                             |
| H74A        | 0.485076 | 0.701646  | 0.144705 | 0.072                                             |
| H74B        | 0.499334 | 0.805254  | 0.146670 | 0.072                                             |
| H75A        | 0.409636 | 0.842510  | 0.119802 | 0.060                                             |
| H75B        | 0.427289 | 0.772977  | 0.086272 | 0.060                                             |
| H76A        | 0.342556 | 0.735100  | 0.101760 | 0.037                                             |
| H76B        | 0.384952 | 0.656753  | 0.115480 | 0.037                                             |
| H81         | 0.444097 | 0.650105  | 0.332240 | 0.030                                             |
| H82A        | 0.486513 | 0.635456  | 0.406860 | 0.073                                             |
| H82B        | 0.493108 | 0.530771  | 0.400891 | 0.073                                             |
| H83A        | 0.575024 | 0.599713  | 0.398212 | 0.086                                             |
| H83B        | 0.546139 | 0.665609  | 0.359884 | 0.086                                             |
| H84A        | 0.588127 | 0.553635  | 0.327805 | 0.051                                             |
| H84B        | 0.558107 | 0.478707  | 0.350254 | 0.051                                             |
| H85A        | 0.507613 | 0.598733  | 0.282437 | 0.055                                             |
| H85B        | 0.514482 | 0.494196  | 0.276066 | 0.055                                             |
| H86A        | 0.426098 | 0.528826  | 0.283932 | 0.042                                             |
| H86B        | 0.454749 | 0.462762  | 0.322230 | 0.042                                             |
| H91A        | 0.351437 | 0.844740  | 0.424741 | 0.032                                             |
| H91B        | 0.389740 | 0.765069  | 0.473197 | 0.031                                             |
| H92A        | 0.283951 | 0.850377  | 0.460844 | 0.037                                             |
| H92B        | 0.314932 | 0.790184  | 0.500818 | 0.037                                             |
| H92C        | 0.323153 | 0.780074  | 0.508772 | 0.038                                             |
| H92D        | 0.287917 | 0.838383  | 0.470085 | 0.038                                             |
| H93A        | 0.335162 | 0.970671  | 0.483430 | 0.050                                             |
| H93B        | 0.324008 | 0.930140  | 0.528426 | 0.050                                             |
| H93C        | 0.321410 | 0.938950  | 0.523677 | 0.050                                             |
| H93D        | 0.379325 | 0.894406  | 0.533450 | 0.050                                             |
| H94A        | 0.410498 | 0.876694  | 0.548939 | 0.049                                             |
| H94B        | 0.414789 | 0.978212  | 0.534603 | 0.049                                             |
| H94C        | 0.385066 | 1.028.656 | 0.497130 | 0.052                                             |
| H94D        | 0.335881 | 1.002.327 | 0.457955 | 0.052                                             |
| H95A        | 0.429541 | 0.934465  | 0.464829 | 0.049                                             |
| H95B        | 0.472656 | 0.886138  | 0.502608 | 0.049                                             |
| H95C        | 0.417107 | 0.981614  | 0.433899 | 0.053                                             |
| H95D        | 0.438167 | 0.915644  | 0.474587 | 0.053                                             |
| H96A        | 0.422374 | 0.753843  | 0.492875 | 0.042                                             |
| H96B        | 0.434572 | 0.783309  | 0.446085 | 0.042                                             |
| H96C        | 0.405723 | 0.829646  | 0.411153 | 0.040                                             |
| H96D        | 0.349879 | 0.881338  | 0.402248 | 0.040                                             |
